# Supplementary material
Source: Springer Nature journal article supplement (https://www.springermedizin.de/resource/supplementary/12884_2012_610_MOESM1_ESM.pdf/9457858)

# Night wakings

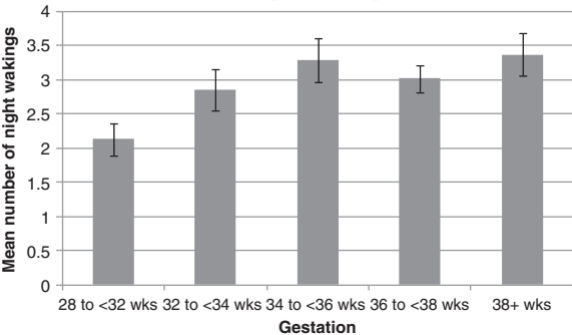

Supplement: MOESM1 [file 9457858]
